# Supplementary material
Source: publisher figshare collection journal article supplement (https://acs.figshare.com/ndownloader/files/13834703)
Supplement: Supplementary file 1 [file 13834703]

## Supporting Information

### **Boosting Photoelectrochemical Water Oxidation with Cobalt Phosphide Nanosheets on Porous BiVO<sub>4</sub>**

*Haili Tong, Yi Jiang, \* Qian Zhang, Wenchao Jiang, Kaili Wang, Xiaoxi Luo, Ze Lin, and Lixin Xia\**

College of Chemistry, Liaoning University, No. 66, Chongshan Middle Road, Huanggu District,  
Shenyang 110036, People's Republic of China

\*Corresponding authors.

E-mail addresses: jiangyi@lnu.edu.cn (Y Jiang); lixinxia@lnu.edu.cn (L Xia).

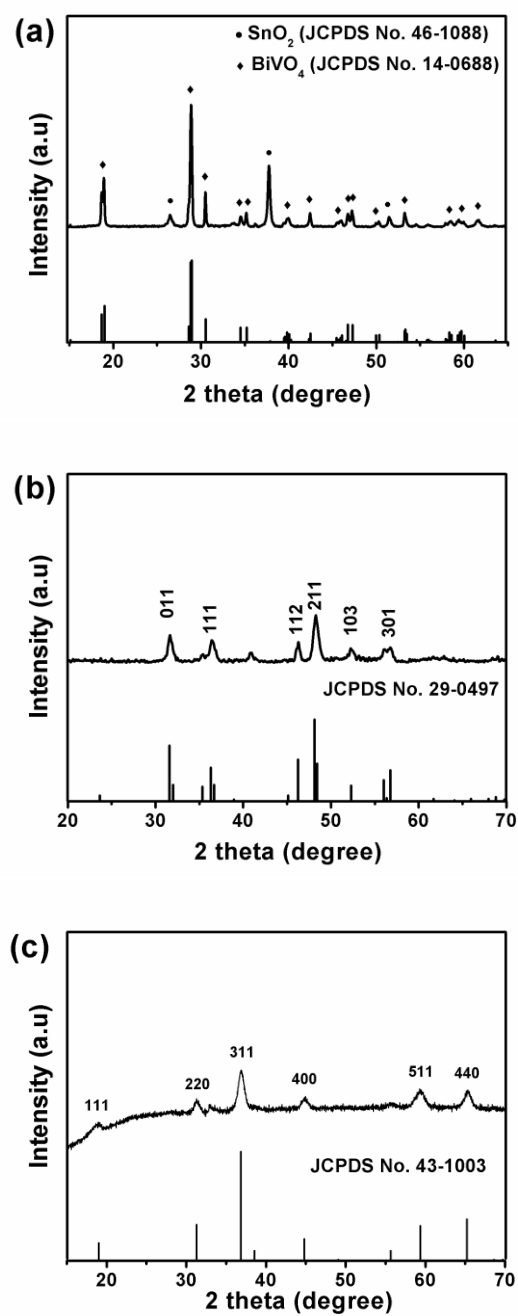

Figure S1. XRD patterns of (a) BiVO<sub>4</sub> electrode, (b) CoP powder and (c) Co<sub>3</sub>O<sub>4</sub> powder.

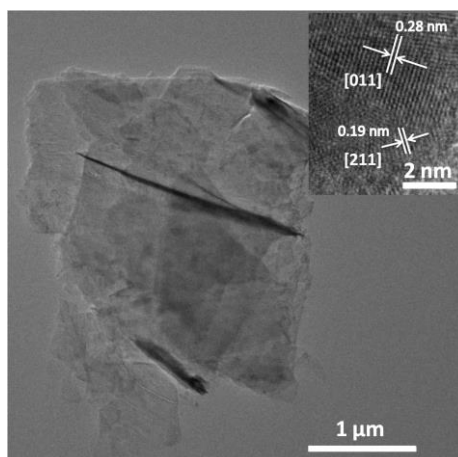

Figure S2. TEM and HRTEM images (inset right) of CoP nanosheets.

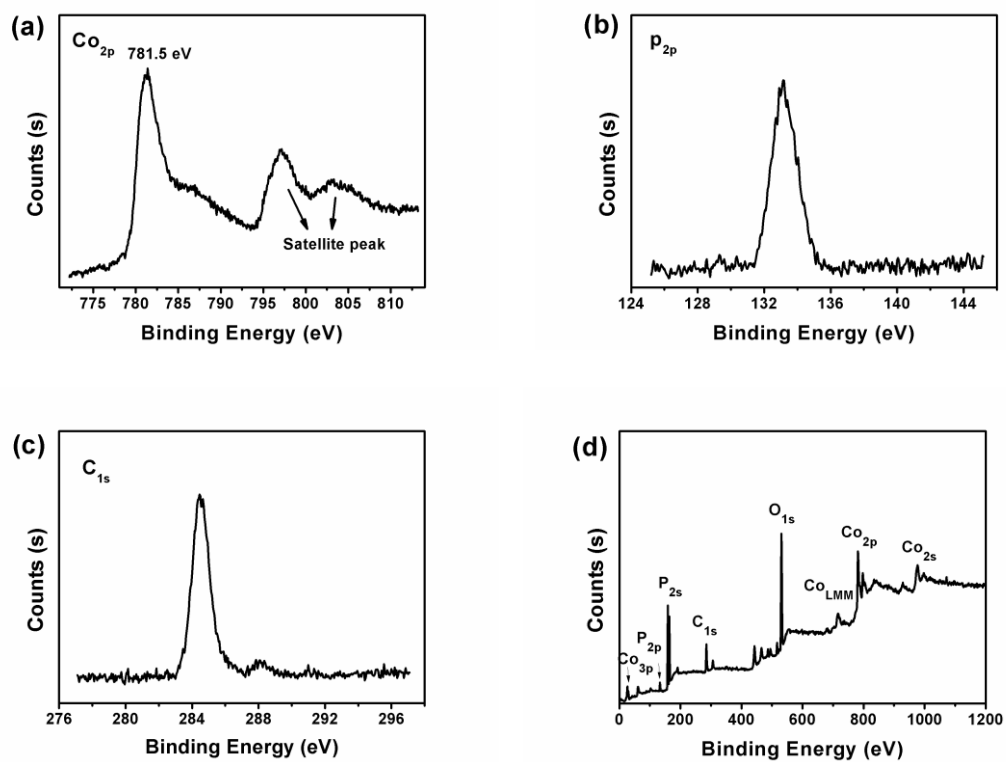

Figure S3. X-ray photoelectron spectroscopy (XPS) spectra of  $\text{BiVO}_4+\text{CoP}$ .

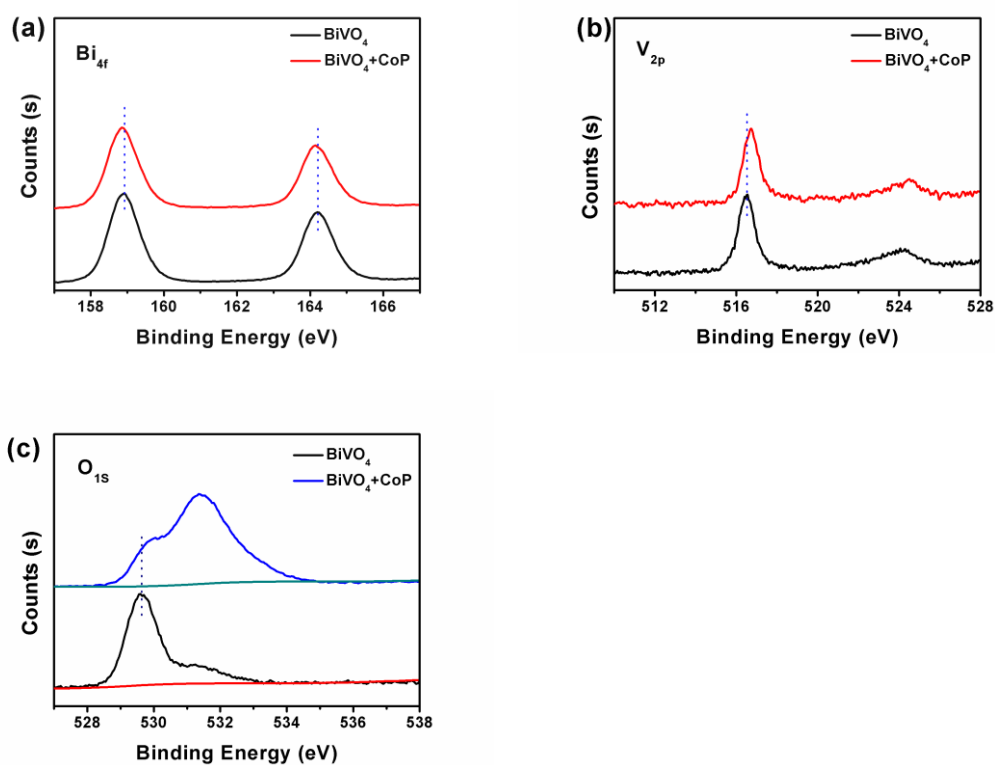

Figure S4. X-ray photoelectron spectroscopy (XPS) detailed spectra over the region of (a)  $\text{Bi}_{4f}$ , (b)  $\text{V}_{2p}$  and (c)  $\text{O}_{1s}$  of  $\text{BiVO}_4+\text{CoP}$ .

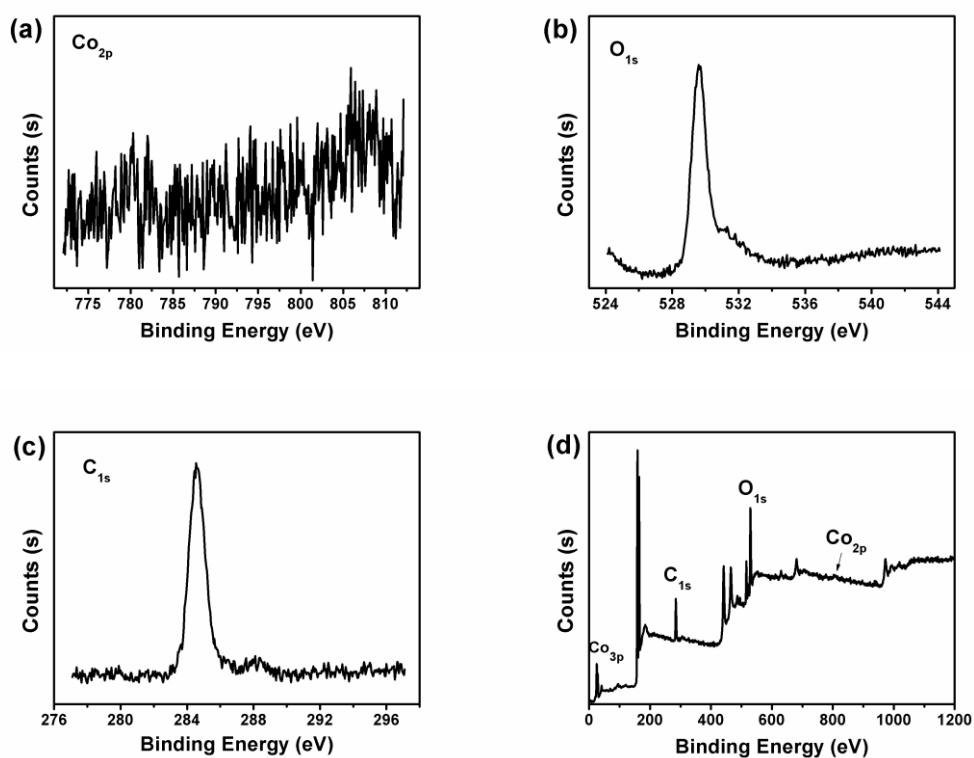

Figure S5. X-ray photoelectron spectroscopy (XPS) spectra of  $\text{F BiVO}_4+\text{Co}_3\text{O}_4$ .

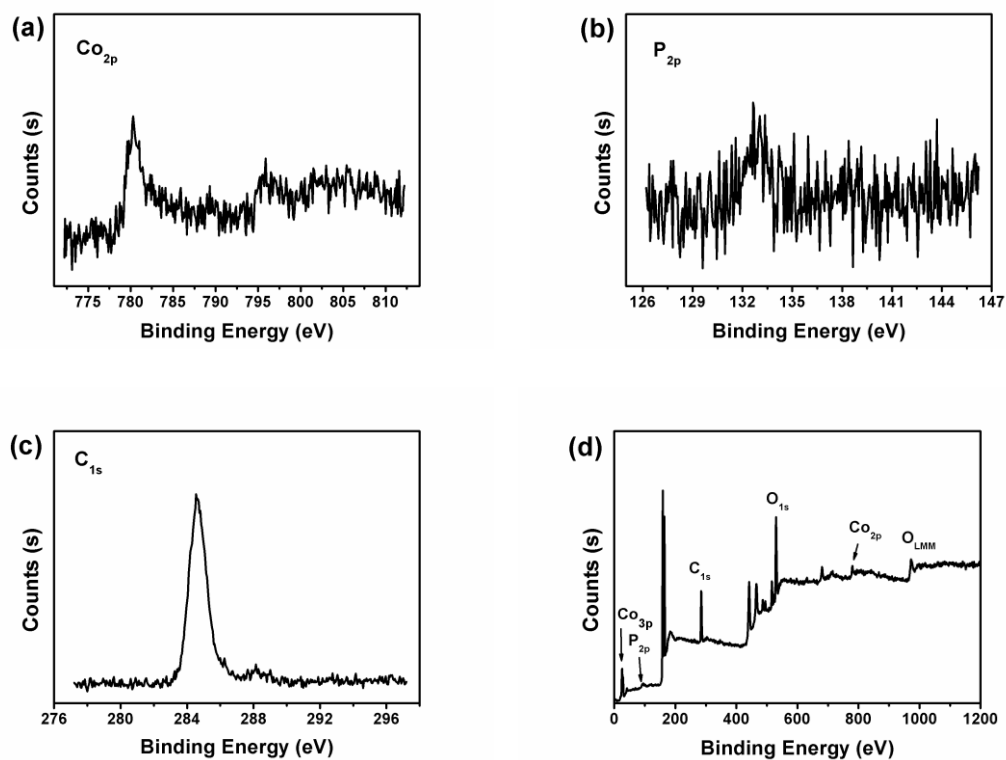

Figure S6. X-ray photoelectron spectroscopy (XPS) spectra of F BiVO<sub>4</sub>+Co-Pi.

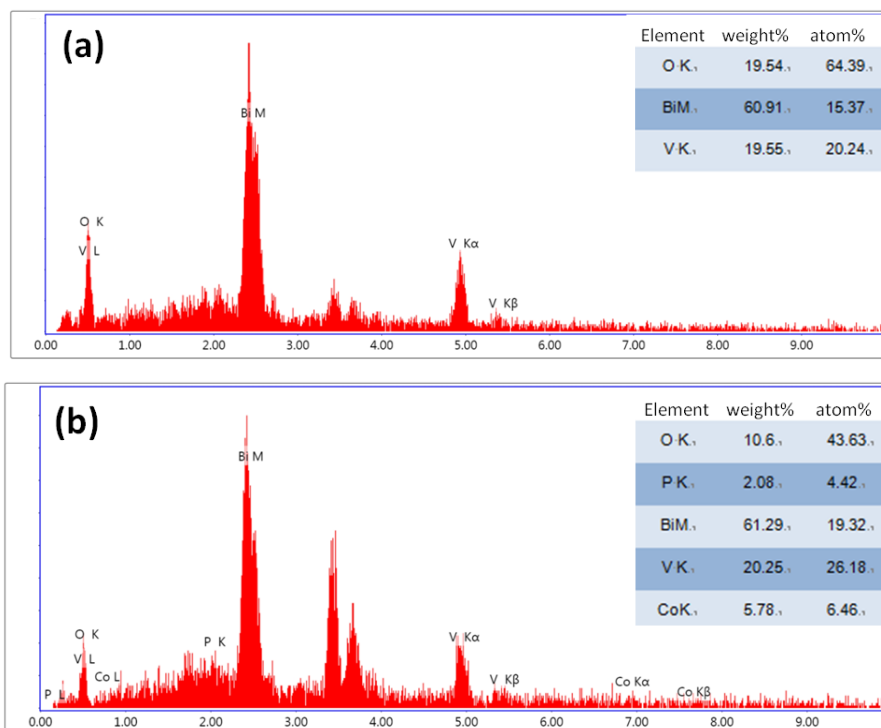

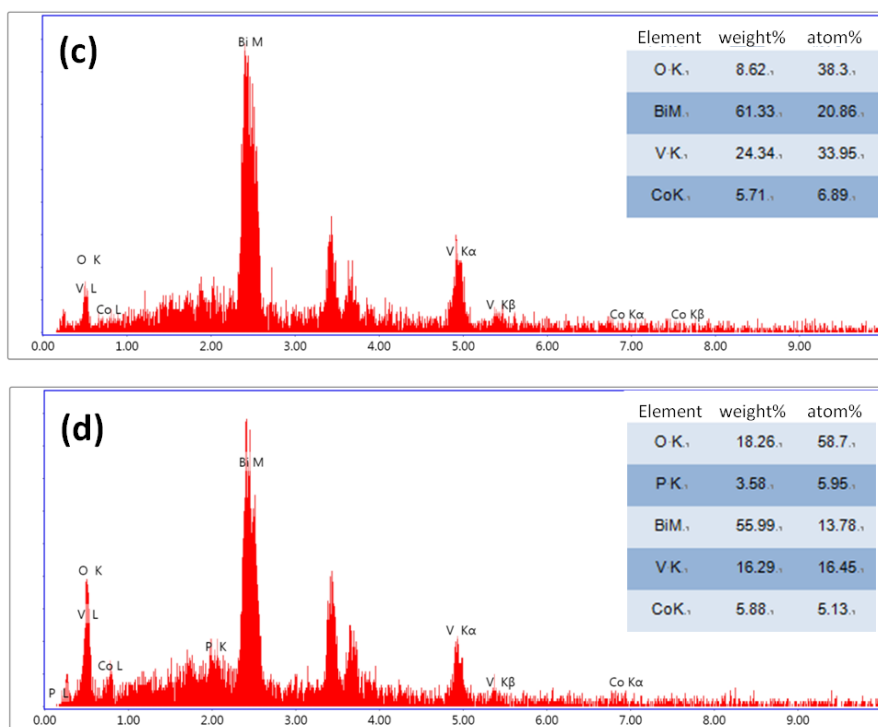

Figure S7. Energy dispersive spectrometry (EDS) of (a)  $\text{BiVO}_4$ , (b)  $\text{BiVO}_4+\text{CoP}$ , (c)  $\text{BiVO}_4+\text{Co}_3\text{O}_4$  and (d)  $\text{BiVO}_4+\text{Co-Pi}$  electrodes.

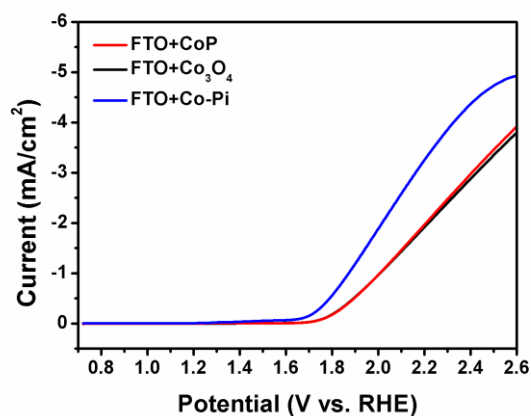

Figure S8. Photocurrent-potential characteristics of FTO+CoP (red); FTO+ $\text{Co}_3\text{O}_4$  (black) and FTO+Co-Pi (blue) electrodes measured (scan rate, 10 mV/s) under illumination ( $100 \text{ mW}/\text{cm}^2$ ) in 0.2 M borate buffer (pH 9.0).

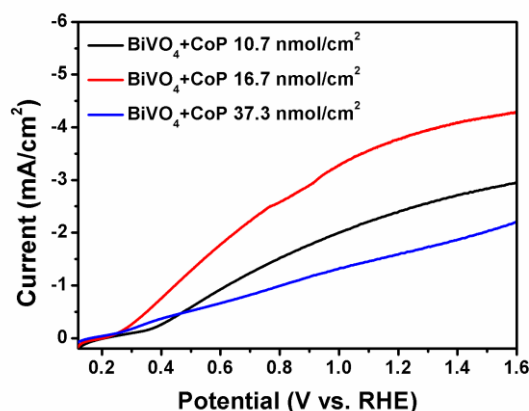

Figure S9. Photocurrent-potential characteristics of BiVO<sub>4</sub> photoanode modified by different concentration of CoP in 0.2 M borate buffer (pH 9.0) under illumination (100 mW/cm<sup>2</sup>).

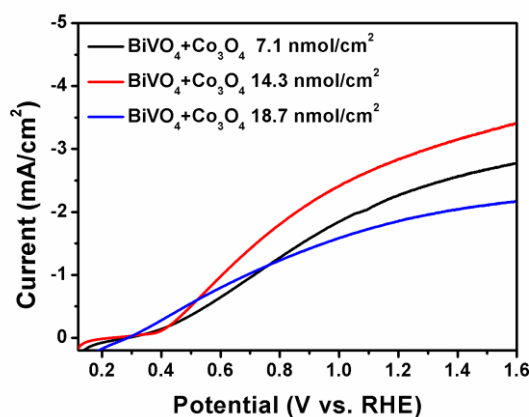

Figure S10. Photocurrent-potential characteristics of BiVO<sub>4</sub> photoanode modified by different concentration of Co<sub>3</sub>O<sub>4</sub> in 0.2 M borate buffer (pH 9.0) under illumination (100 mW/cm<sup>2</sup>).

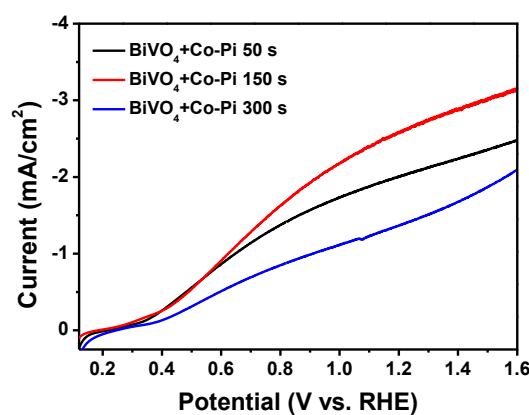

Figure S11. Photocurrent-potential characteristics of BiVO<sub>4</sub> photoanode modified by different electrodeposition time of Co-Pi in 0.2 M borate buffer (pH 9.0) under illumination (100 mW/cm<sup>2</sup>).

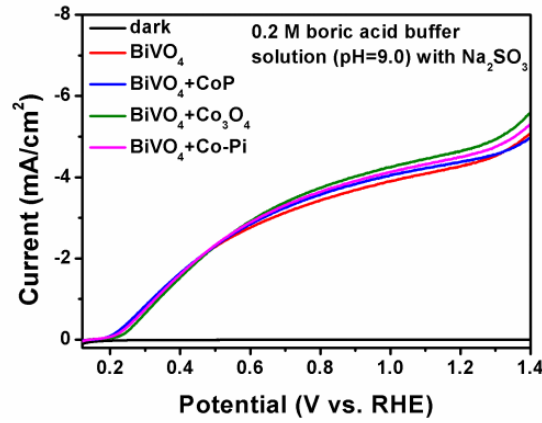

Figure S12. Photocurrent-potential characteristics of BiVO<sub>4</sub>; BiVO<sub>4</sub>+CoP; BiVO<sub>4</sub>+Co<sub>3</sub>O<sub>4</sub>; BiVO<sub>4</sub>+Co-Pi electrodes measured (scan rate, 10 mV/s) with and without illumination (100 mW/cm<sup>2</sup>) in 0.2 M borate buffer with 1 M Na<sub>2</sub>SO<sub>3</sub>.

$J_{H_2O}$  (the photocurrent of water splitting) is a product of the rate of photon absorption expressed as a  $J_{absorbed}$  (current density),  $\eta_{charge\ separation}$  is the charge separation efficiency of the photogenerated holes that refer to the bulk recombination, and  $\eta_{charge\ injection}$  is charge injection yield of the surface reaching holes into the electrolyte:

$$J_{H_2O} = J_{absorbed} * \eta_{charge\ separation} * \eta_{charge\ injection} \quad \text{Equation S1}$$

The photocurrent measured in the electrolyte with Na<sub>2</sub>SO<sub>3</sub> ( $J_{Na_2SO_3}$ ) is only a product of  $J_{absorbed}$  and  $\eta_{charge\ separation}$ , assuming the charge injection yield becomes 100% ( $\eta_{charge\ injection} = 1$ ) in the presence of a hole scavenger (Na<sub>2</sub>SO<sub>3</sub>) in the electrolyte:

$$J_{Na_2SO_3} = J_{absorbed} * \eta_{charge\ separation} \quad \text{Equation S2}$$

Based on equation S1 and S2, the charge injection yield can be achieved:

$$\eta_{charge\ injection} = J_{H_2O} / J_{Na_2SO_3} \quad \text{Equation S3}$$

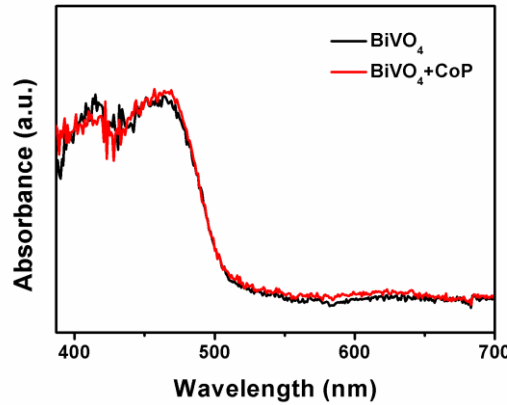

Figure S13. UV-Vis absorption spectra of bare BiVO<sub>4</sub> and BiVO<sub>4</sub>+CoP photoanodes.



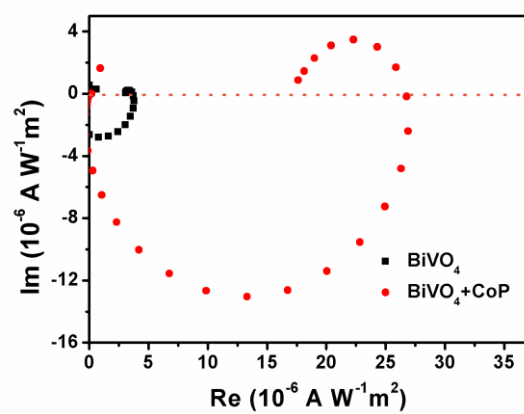

Figure S14. IMPS responses of BiVO<sub>4</sub> and BiVO<sub>4</sub>+CoP photoanodes at 0.9 V vs. RHE.
